# Supplementary material for: Combining presumptive color tests, pressure-sensitive adhesive-based collection, and paper spray-mass spectrometry for illicit drug detection
Source: Royal Society of Chemistry journal article supplement (doi:10.1039/d3an00559c), 2023-01-01
Supplement: d3an00559c1.pdf [file d3an00559c1.pdf]

## Supplementary Information

### Combining Presumptive Color Tests, Pressure-Sensitive Adhesive-Based Collection, and Paper Spray-Mass Spectrometry for Illicit Drug Detection

#### Contents

Table S1. Benchtop Mass Spectrometer parameters for MS and MS/MS method

Table S2. Portable Mass Spectrometer parameters for MS and MS/MS method

Figure S1. Comparison of reagent blanks and positive color tests

Figure S2. Signal-to-blank ratio of analyte with and without color test reagent

Figure S3. Representative MS/MS spectra of realistic sampling procedures

Table S1. Benchtop Mass Spectrometer parameters for MS and MS/MS method and subsequent analysis

| <b>Analyte</b>  | <b>Molecular Weight (g/mol)</b> | <b>Precursor Ion (<i>m/z</i>)</b> | <b>Product Ion (<i>m/z</i>)</b> | <b>Collision Energy (eV)</b> | <b>Deuterated Standard</b> |
|-----------------|---------------------------------|-----------------------------------|---------------------------------|------------------------------|----------------------------|
| Cocaine         | 303.25                          | 304.25                            | 182                             | 35                           | D3                         |
| Methamphetamine | 369.42                          | 150.08                            | 119                             | 50                           | D11                        |
| Heroin          | 149.23                          | 370.25                            | 268                             | 30                           | D9                         |

Table S2. Portable Mass Spectrometer parameters for MS and MS/MS method and subsequent analysis

| <b>Analyte</b>  | <b>Precursor Ion<br/>(<i>m/z</i>)</b> | <b>Detector<br/>Anode (V)</b> | <b>RF Level<br/>(V)</b> | <b>ISO Freq.<br/>Center (kHz)</b> | <b>CID<br/>Level (V)</b> |
|-----------------|---------------------------------------|-------------------------------|-------------------------|-----------------------------------|--------------------------|
| Cocaine         | 304                                   | -1450                         | 150                     | 76                                | 0.65                     |
| Methamphetamine | 150                                   | -1450                         | 150                     | 160                               | 0.75                     |
| Heroin          | 370                                   | -1600                         | 250                     | 73.3                              | 0.75                     |

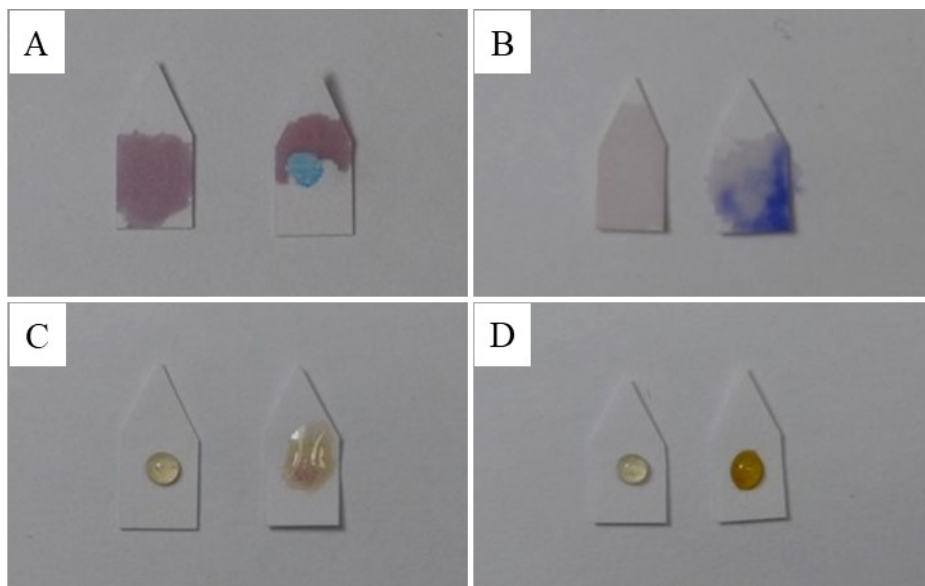

Figure S1. Comparison of reagent blanks (left) and positive color tests (right) on PSA-lined paper, A) Cobalt thiocyanate test with and without 10  $\mu\text{g}$  of cocaine HCl, B) Simon test with and without 10  $\mu\text{g}$  of methamphetamine, C) Marquis test with and without 10  $\mu\text{g}$  of street purity heroin, and D) Marquis test with and without 10  $\mu\text{g}$  of methamphetamine.

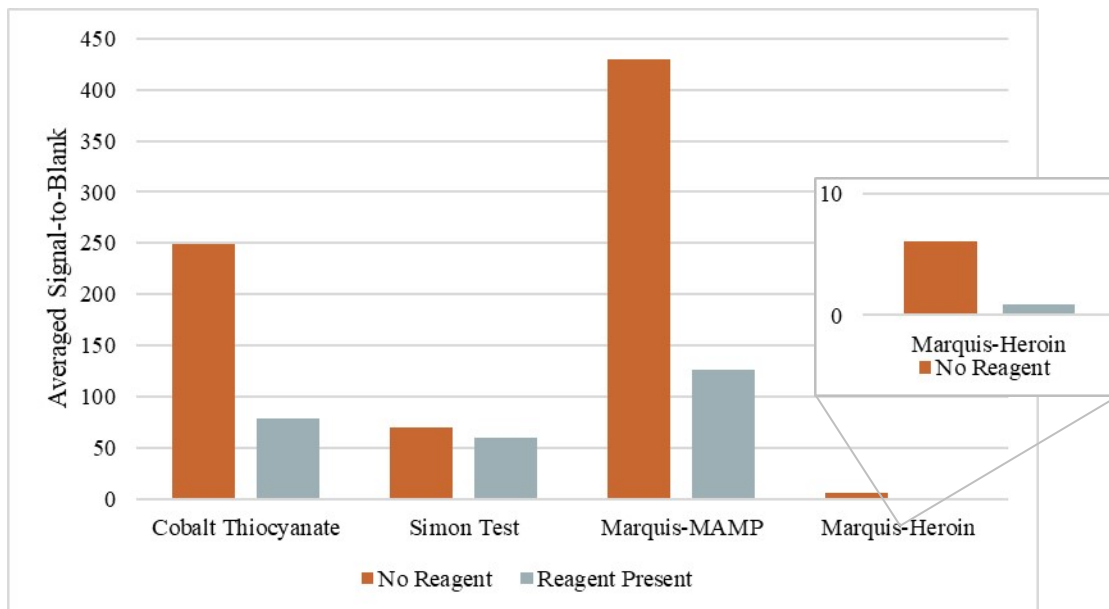

Figure S2. Averaged signal-to-blank ratio at threshold amount of analyte with and without color test reagent

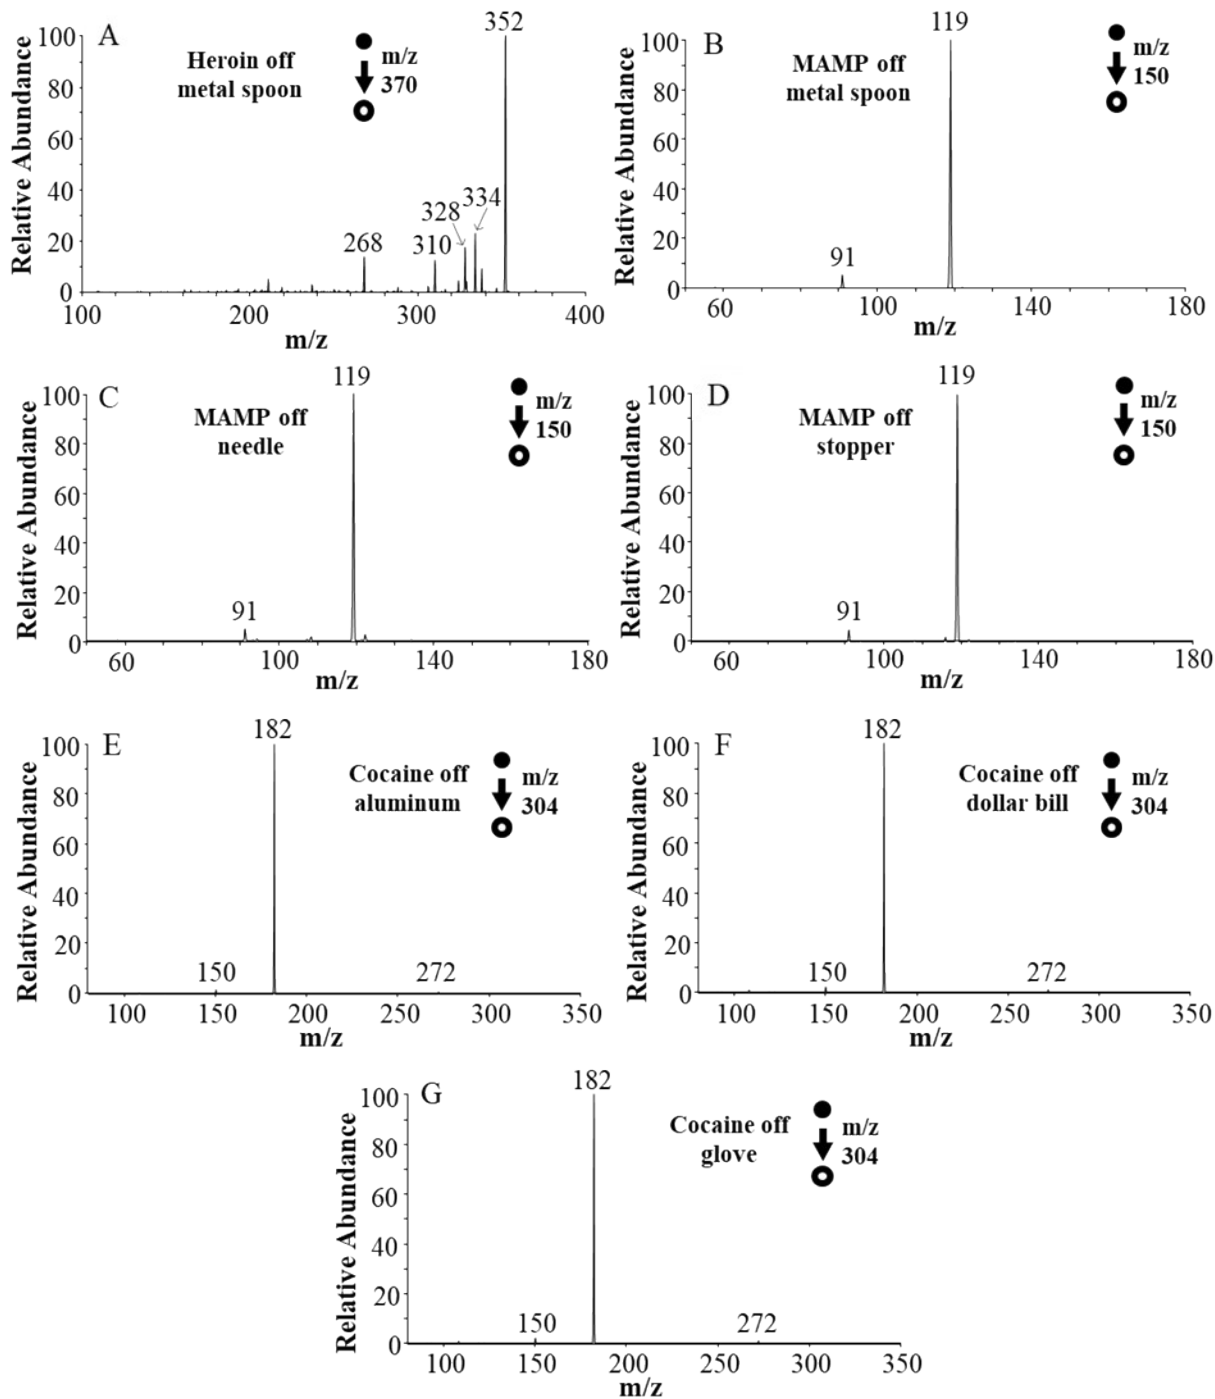

Figure S3. Representative MS/MS spectra of realistic sampling procedures immediately following color testing on benchtop MS, (A) Heroin recovered off metal spoon, (B) Methamphetamine recovered off metal spoon, (C) Methamphetamine recovered off needle, (D) Methamphetamine recovered off syringe stopper, (E) Cocaine recovered off aluminum surface, (F) Cocaine recovered off dollar bill, and (G) Cocaine recovered off glove wiped across the surface of the bill.
